# Supplementary material for: Latexin Is Down-Regulated in Hematopoietic Malignancies and Restoration of Expression Inhibits Lymphoma Growth
Source: PubMed Central journal article supplement (PMC3459965; doi:10.1371/journal.pone.0044979), 2012-09-27
Supplement: pone.0044979.s002.pdf [file pone.0044979.s002.pdf]

| Probeset                          | 1418625_s_at                             | 1448730_at                      | 1453770_at                   | 1427995_at                   | 1440617_at                   |
|-----------------------------------|------------------------------------------|---------------------------------|------------------------------|------------------------------|------------------------------|
| Gene Title                        | glyceraldehyde-3-phosphate dehydrogenase | carboxy-peptidase A3, mast cell | carboxy-peptidase A4         | carboxy-peptidase A5         | carboxy-peptidase A6         |
| Gene Symbol                       | GAPDH                                    | Cpa3                            | Cpa4                         | Cpa5                         | Cpa6                         |
| Chromosomal Location              | 6 C 59.3cM                               | 3 A2   3 13.2 cM                | 6 A3.3                       | 6 A3.3                       | 1 A2                         |
| Entrez Gene                       | 14433                                    | 12873                           | 71791                        | 74649                        | 329093                       |
| mean_y_B6                         | 11982.87                                 | 391.33                          | 20.43                        | 16.17                        | 11.43                        |
| GO Biological Process Description | glucose metabolism /// glycolysis        | proteolysis and peptidolysis    | proteolysis and peptidolysis | proteolysis and peptidolysis | proteolysis and peptidolysis |
| GO Cellular Component Description | cytoplasm /// mitochondrion              | extracellular space             | extracellular space          | ---                          | ---                          |
